# Supplementary material for: Long-term PM trends in southern Finland from three different measurement techniques
Source: Copernicus journal article supplement (doi:10.5194/ar-2025-16), 2025-06-02
Supplement: Supplementary file 1 [file ar-2025-16-supplement.pdf]

**Long-term PM trends in southern Finland from three different measurement techniques**

**Ylivinkka et al.**

*Correspondence to:* Ilona Ylivinkka (ilona.ylivinkka@helsinki.fi)

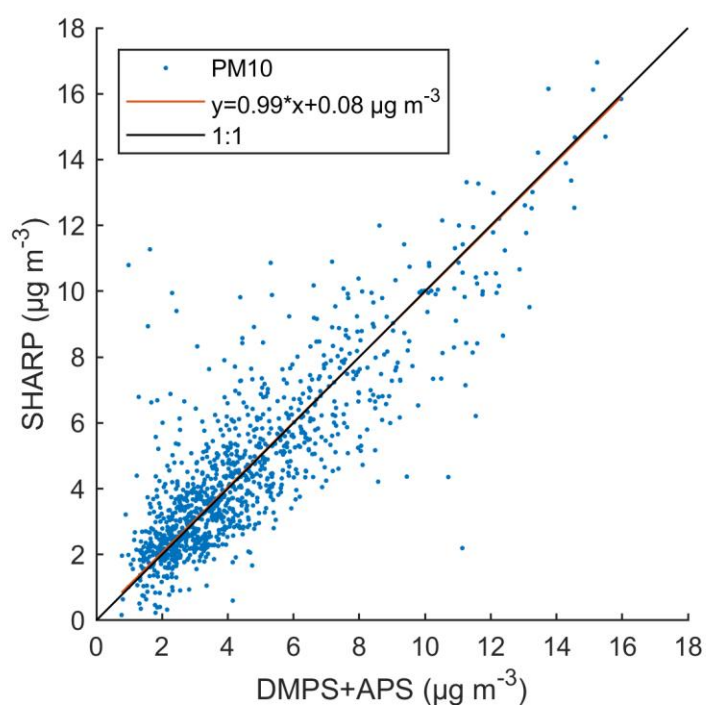

**Figure S1:** Correlation between PM<sub>10</sub> from SHARP and DMPS+APS derived mass measurements.

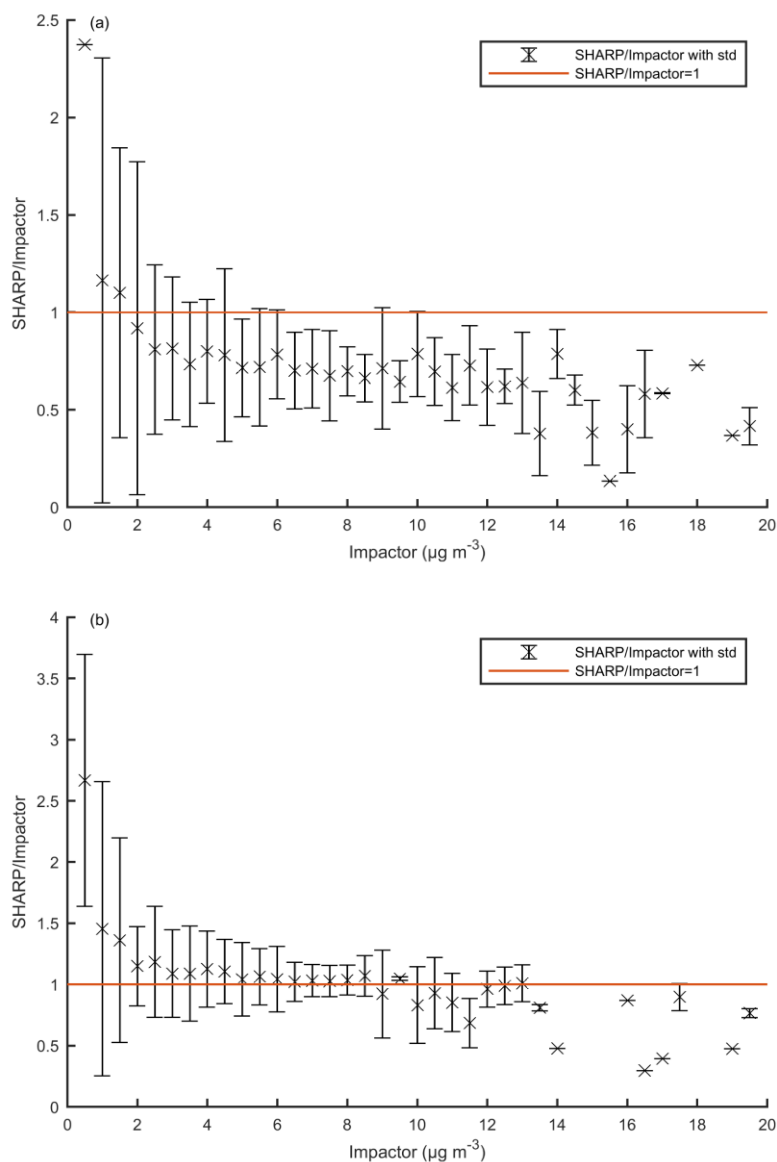

**Figure S2:** SHARP–impactor ratio as a function of PM<sub>10</sub> mass concentration from impactor. (a) SHARP heating set to 45 °C and (b) SHARP heating set to 35 °C.

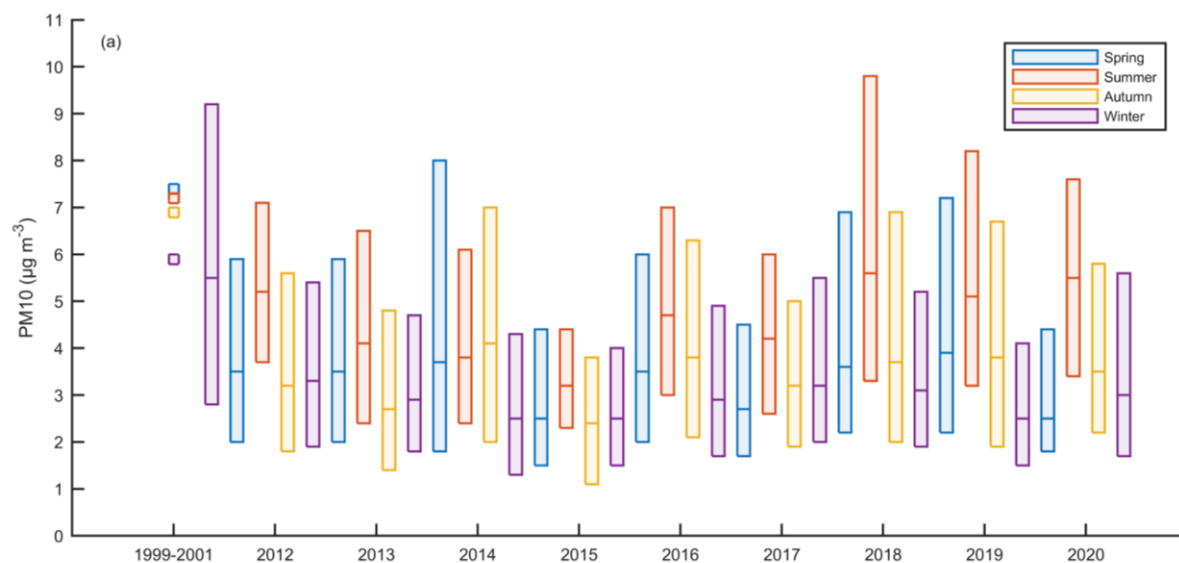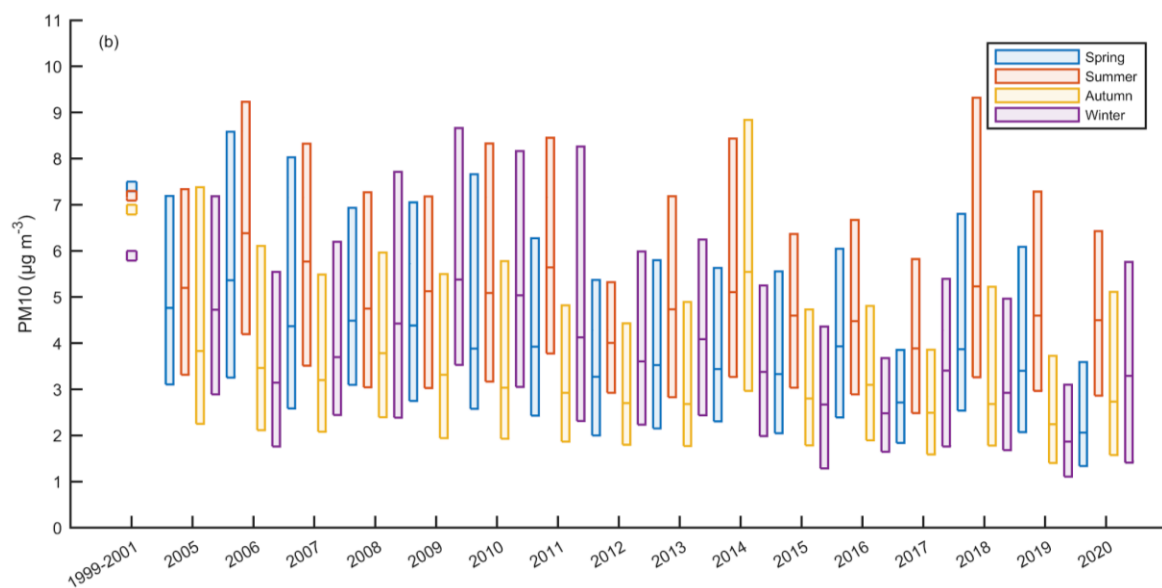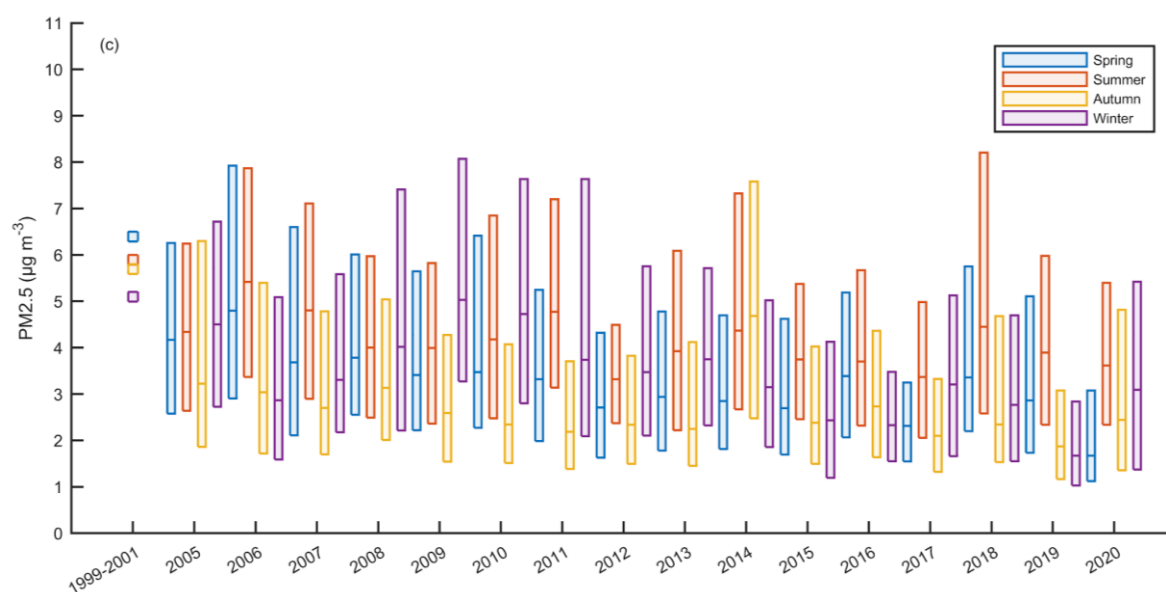

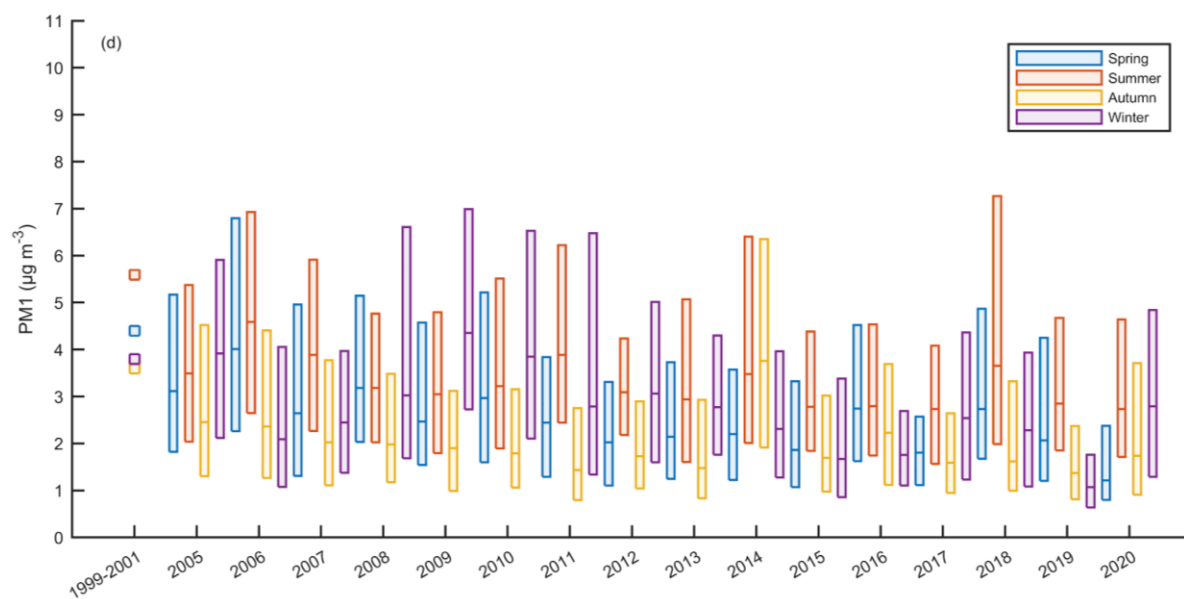

**Figure S3:** Seasonal median  $PM_{10}$ ,  $PM_{2.5}$  and  $PM_1$  concentrations and their 25 and 75 quartile ranges measured with (a) SHARP (only  $PM_{10}$ ) and (b-d) DMPS+APS.

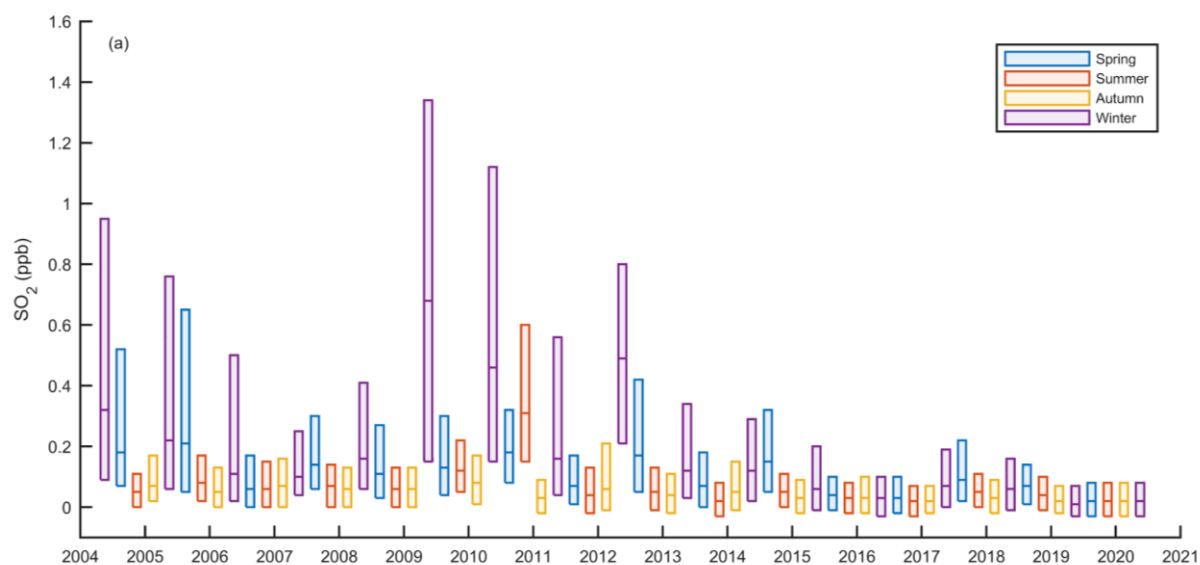

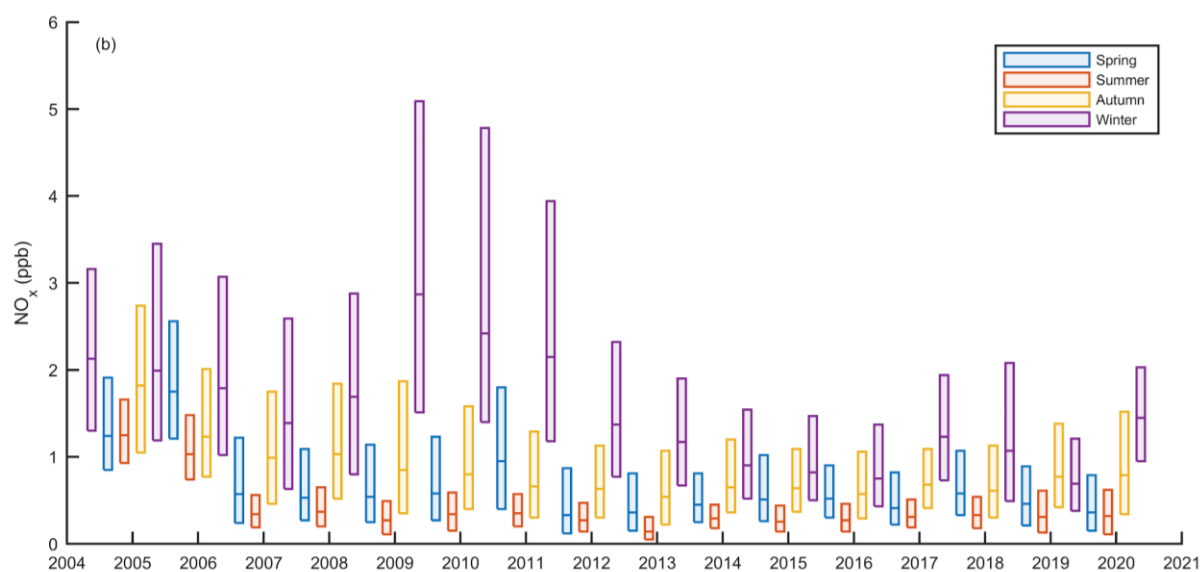

**Figure S4:** Seasonal median (a) SO<sub>2</sub> and (b) NO<sub>x</sub> concentration and their 25 and 75 quartile ranges measured at SMEAR II.

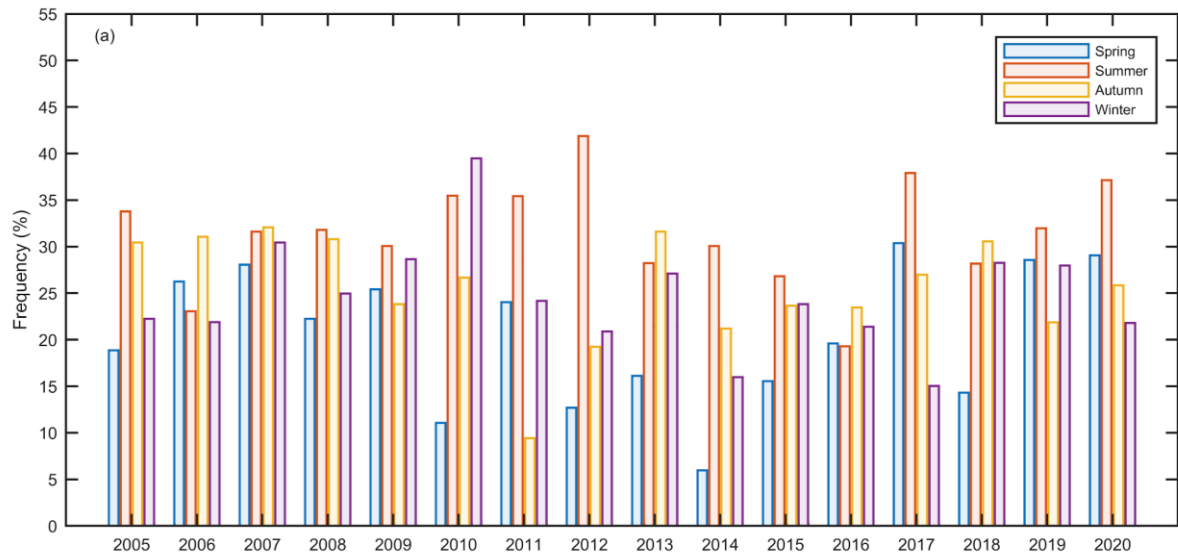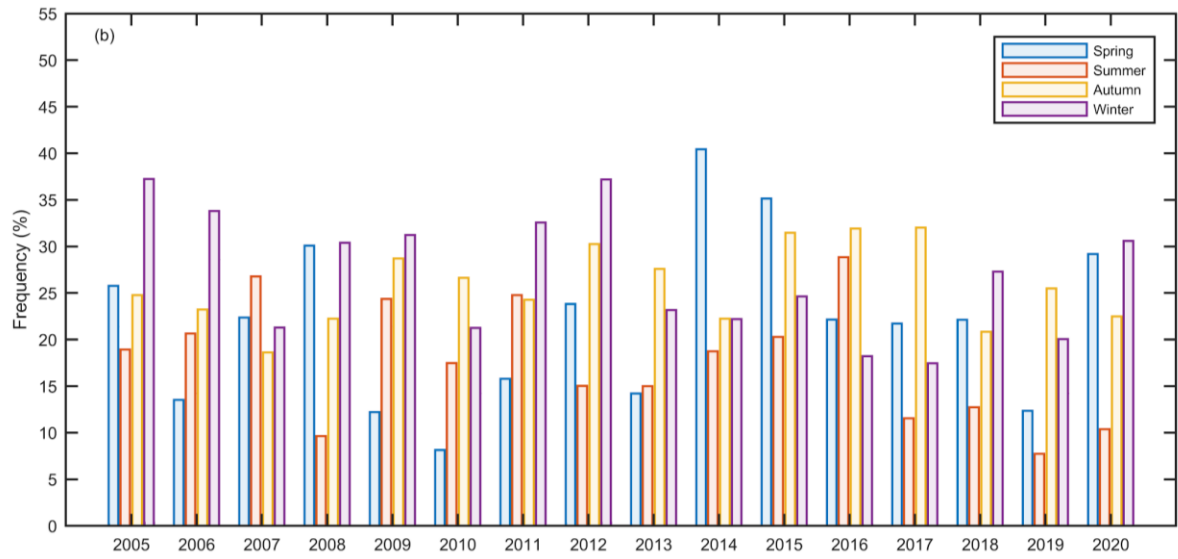

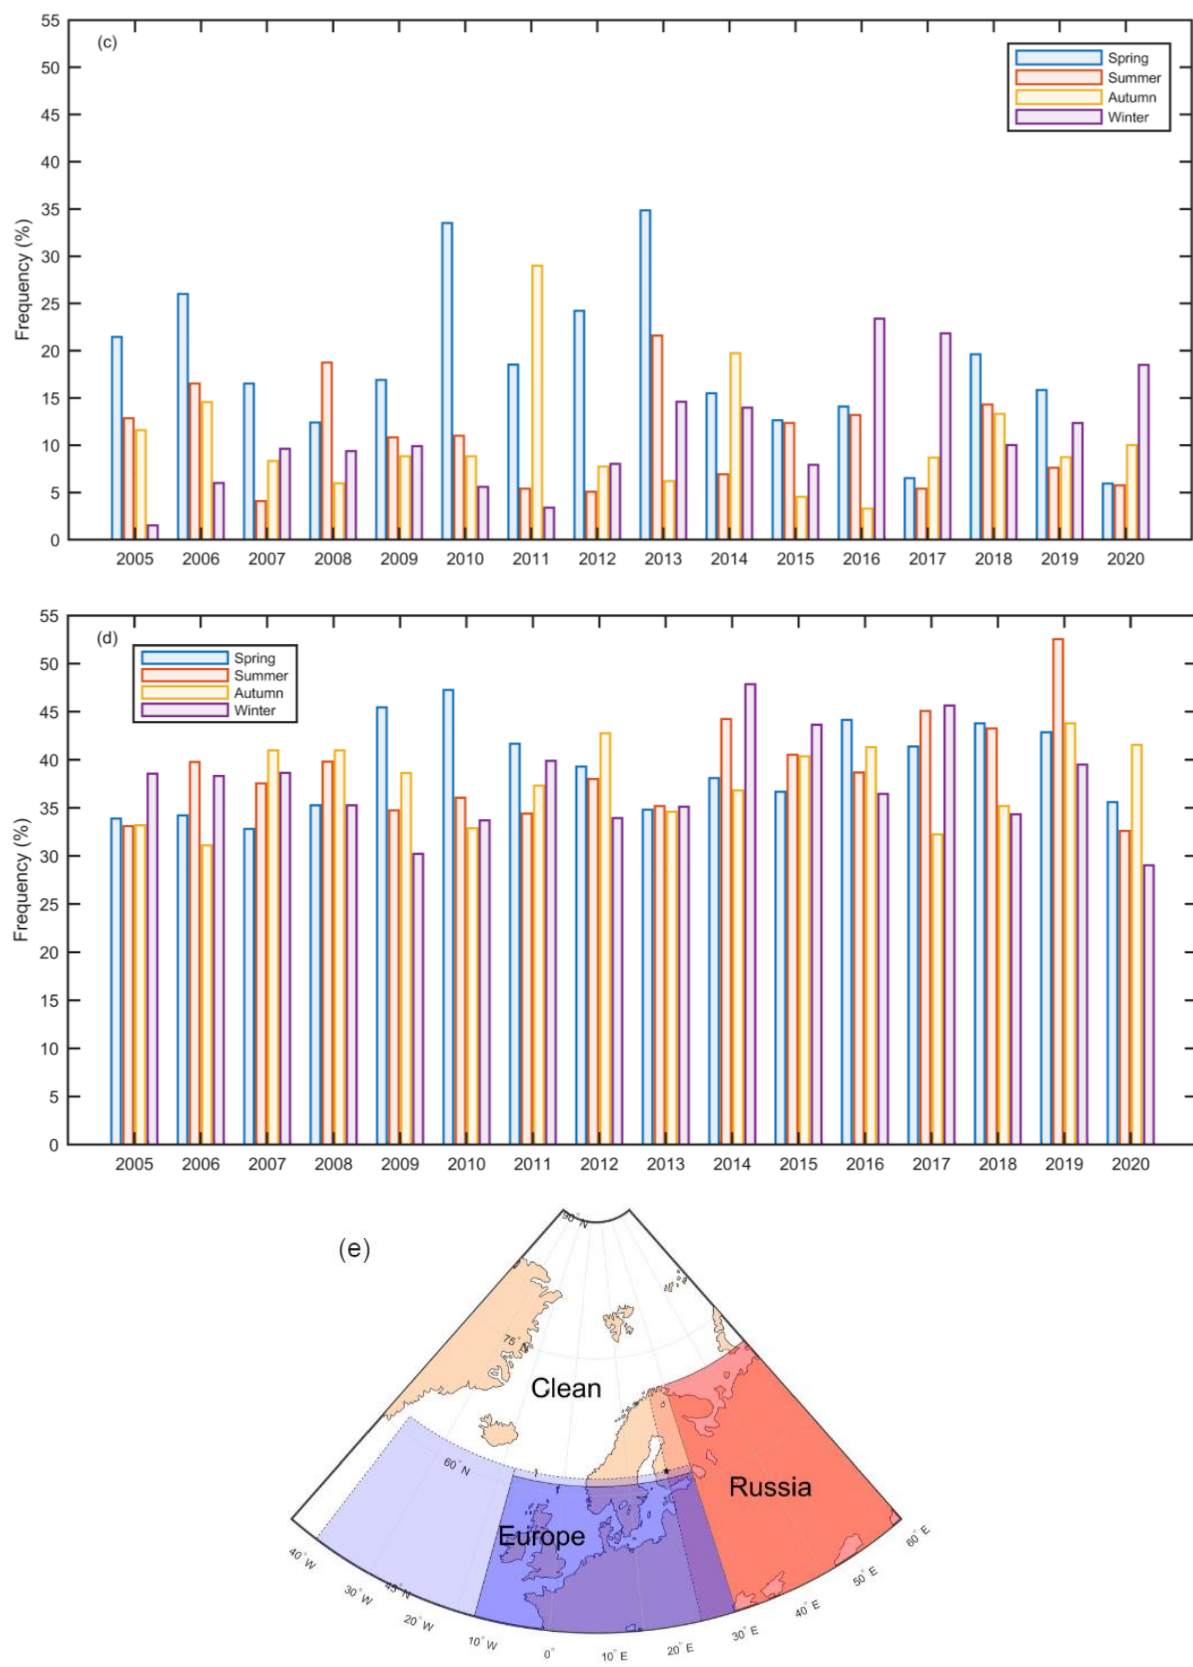

**Figure S5:** Seasonally divided frequency of different air mass origin sectors. (a) Clean sector, (b) European, (c) Russian, and (d) mixed sectors. (e) Map of different sectors.

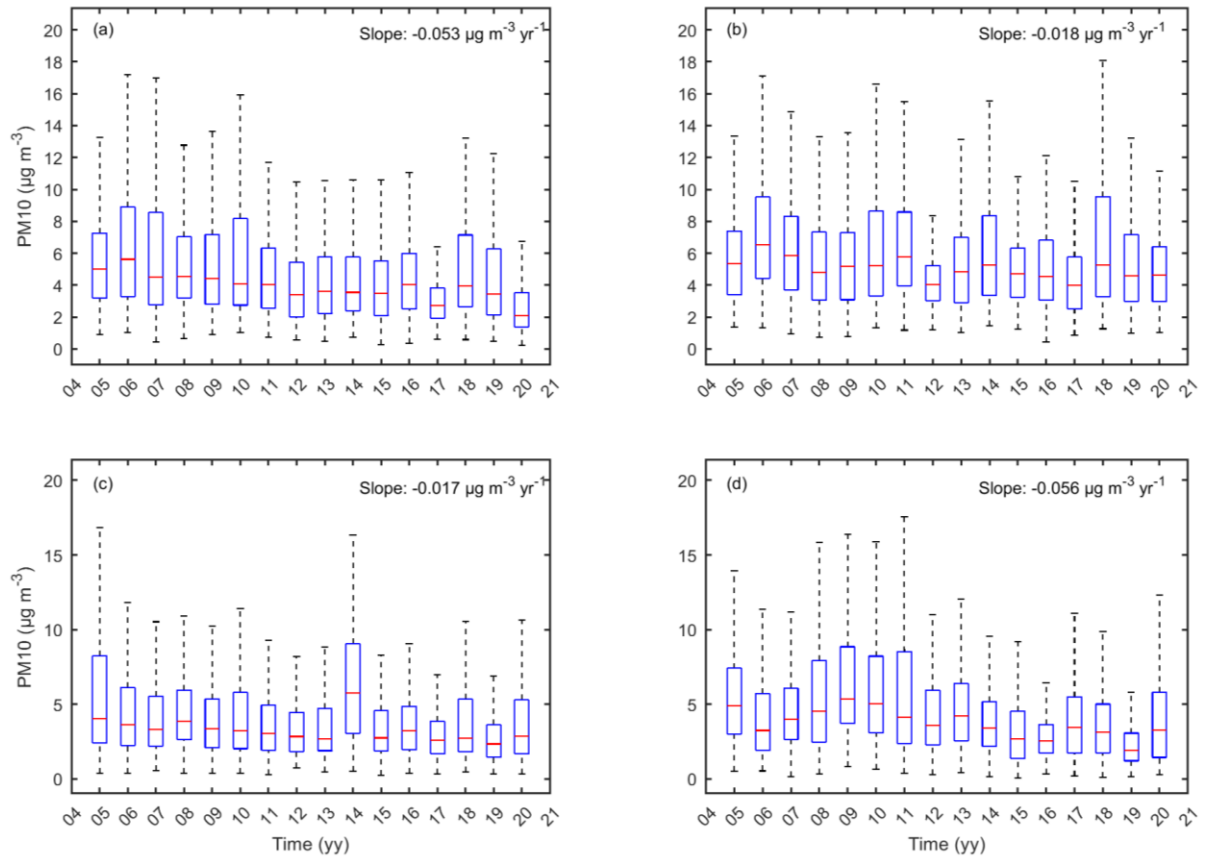

**Figure S6:** PM<sub>10</sub> concentration with the impactor method in (a) spring, (b) summer, (c) autumn, and (d) winter. Red horizontal line represents the median, the distance between the box edges shows the interquartile range, and whiskers extend to 1.5 times the interquartile range. Outliers are not shown. Slope represents trend calculated using seasonal Mann-Kendall test. The trends were statistically significant in spring and winter, but not in summer and autumn.



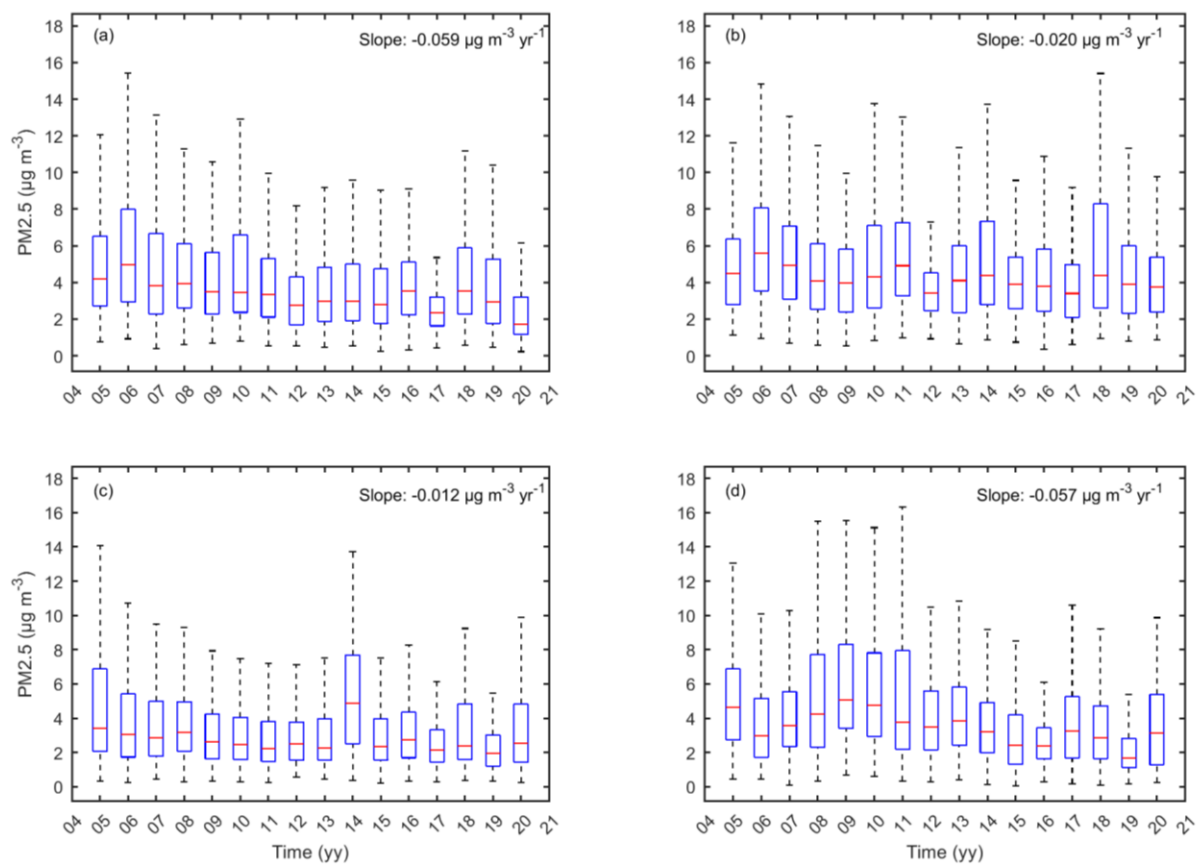

**Figure S7:** PM<sub>2.5</sub> concentration with the impactor method in (a) spring, (b) summer, (c) autumn, and (d) winter. Markers as in S5. The trends were statistically significant in spring and winter, but not in summer and autumn.

**Table S1:** PM trends from 6 h averaged DMPS+APS data in 2005–2020 in µg m<sup>-3</sup> y<sup>-1</sup>. All trends are statistically significant in 95 % significance level.

|                   | Spring | Summer | Autumn | Winter |
|-------------------|--------|--------|--------|--------|
| PM <sub>10</sub>  | -0.038 | -0.012 | -0.016 | -0.066 |
| PM <sub>2.5</sub> | -0.034 | -0.013 | -0.009 | -0.061 |
| PM <sub>1</sub>   | -0.027 | -0.013 | -0.007 | -0.042 |

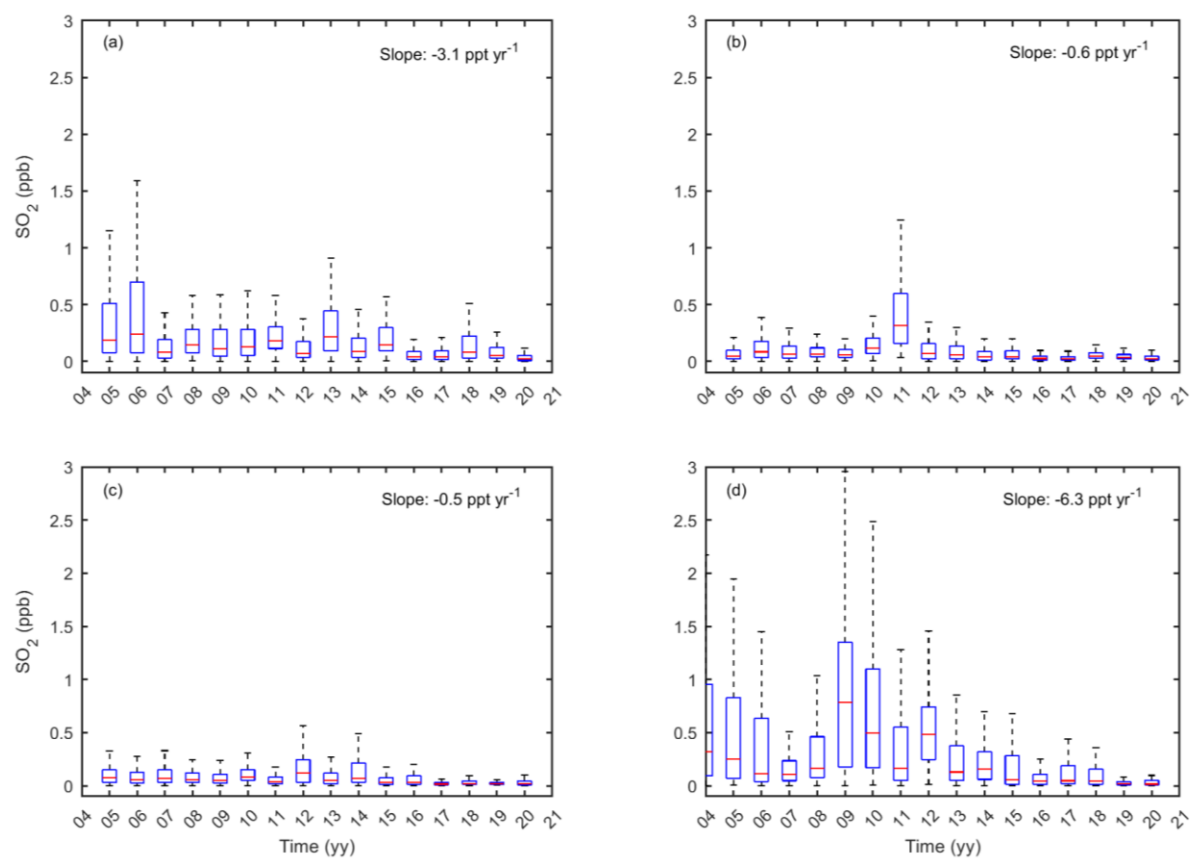

**Figure S8:** SO<sub>2</sub> concentration in (a) spring, (b) summer, (c) autumn, and (d) winter. Markers as in S5.

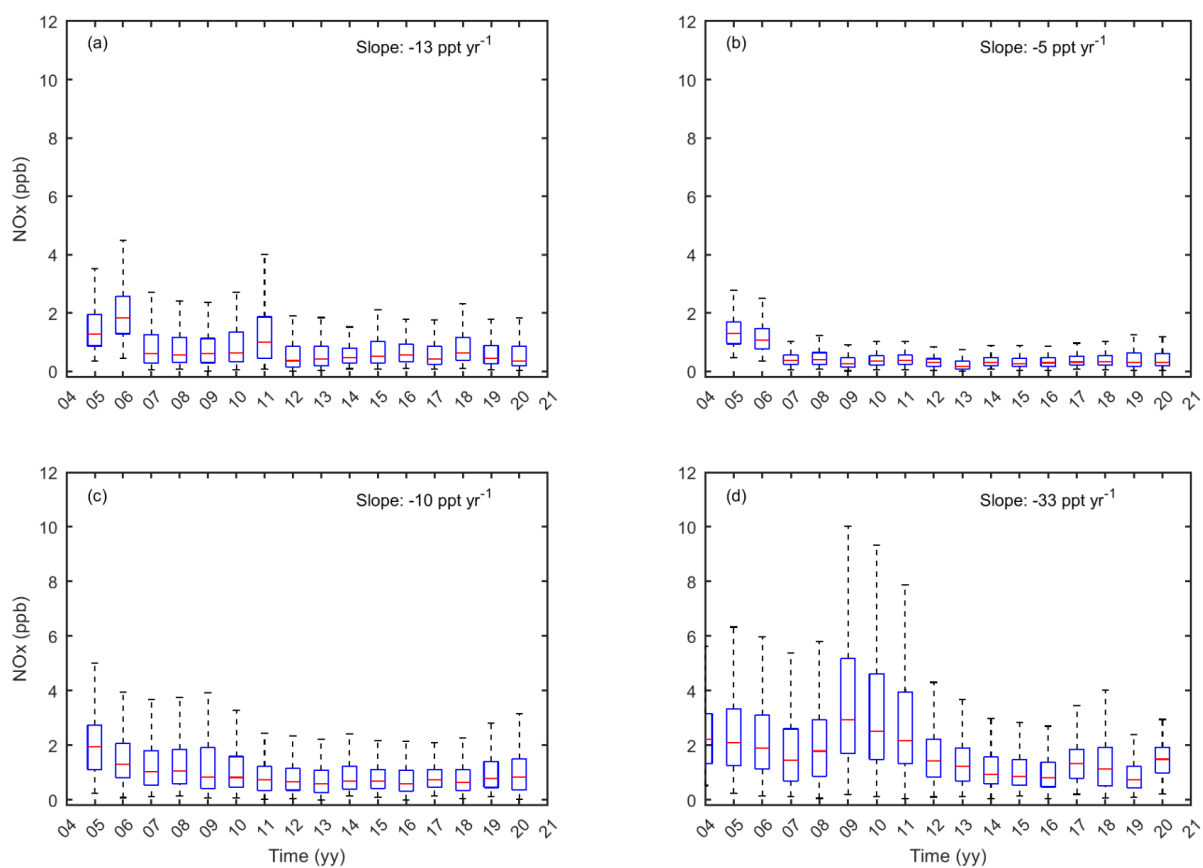

**Figure S9:** NO<sub>x</sub> concentration in (a) spring, (b) summer, (c) autumn, and (d) winter. Markers as in S5.

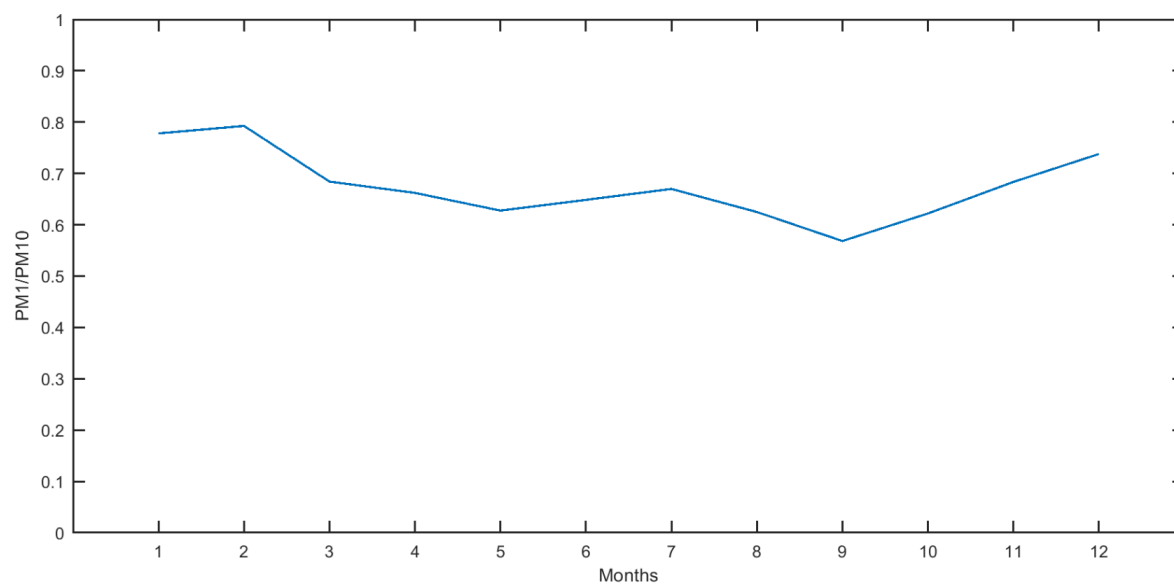

**Figure S10:** Monthly median PM<sub>1</sub> to PM<sub>10</sub> ratio using impactor data.

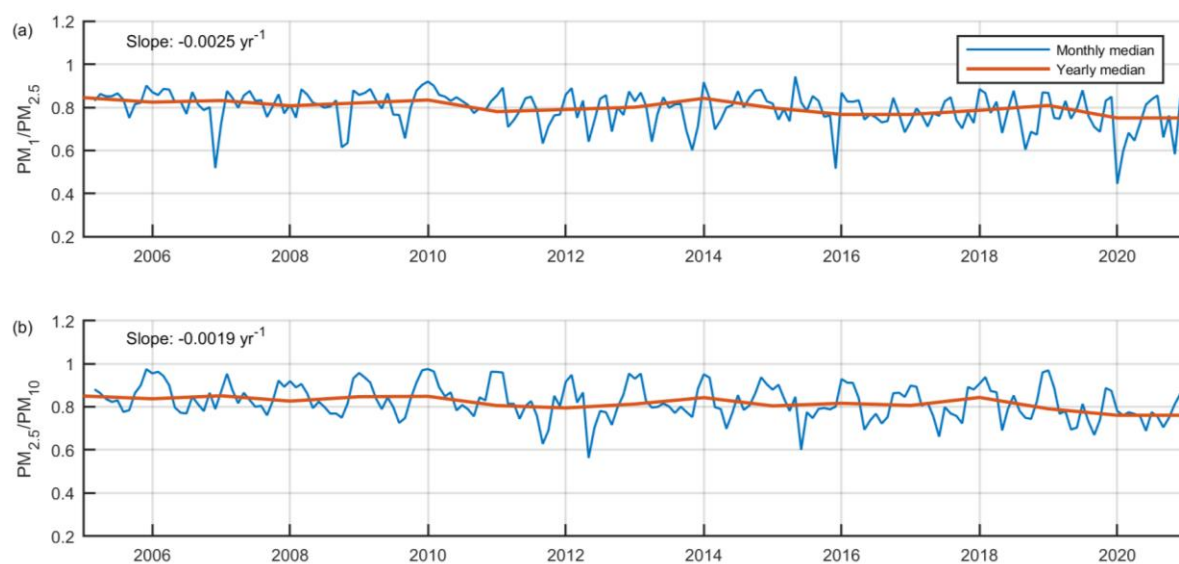

**Figure S11:** Timeseries of monthly (blue) and yearly (red) median (a)  $PM_1$  to  $PM_{2.5}$  and (b)  $PM_{2.5}$  to  $PM_{10}$  ratios using impactor data. Slope represents trend calculated using Mann-Kendall test.
